# Supplementary material
Source: MDPI journal article supplement (https://www.mdpi.com/2313-0105/10/3/93)
Supplement: s1 [file s1]

## **SUPPLEMENTARY MATERIALS**

### **Modification of layered cathodes of sodium-ion batteries with conducting polymers**

M. Ángeles Hidalgo, Pedro Lavela, José L. Tirado, Manuel Aranda

Grupo PAIDI FQM288. Instituto Químico para la Energía y el Medioambiente  
Departamento de Química Inorgánica e Ingeniería Química, Campus de Rabanales,  
Edificio Marie Curie, planta 1, 14071 Córdoba, España

Table S1. Results of the Rietveld analysis of powder X-ray diffraction data of the original NFM sample

|                                    |                      |
|------------------------------------|----------------------|
| Phase name                         | Hexagonal P2         |
| Space group                        | P6 <sub>3</sub> /mmc |
| R <sub>Bragg</sub>                 | 2.550                |
| R <sub>wp</sub>                    | 16.17                |
| <i>a</i> (Å)                       | 2.90419(22)          |
| <i>c</i> (Å)                       | 11.16592(91)         |
| Cell Volume (Å <sup>3</sup> )      | 81.561(17)           |
| Crystallite Size                   | 229(39)              |
| Strain $\epsilon_0$                | 0.050(52)            |
| Preferred Orientation<br>([0 0 1]) | 0.9884(83)           |

| Site | Atom | x       | y       | z         | Occ      | Beq    |
|------|------|---------|---------|-----------|----------|--------|
| 2a   | Mn   | 0.00000 | 0.00000 | 0.00000   | 0.534(5) | -1.319 |
| 2a   | Ni   | 0.00000 | 0.00000 | 0.00000   | 0.241(9) | 0.3224 |
| 2a   | Fe   | 0.00000 | 0.00000 | 0.00000   | 0.238(9) | 8.939  |
| 2b   | Na1  | 0.00000 | 0.00000 | 0.25000   | 0.31(3)  | 8.148  |
| 2d   | Na2  | 0.33333 | 0.66667 | 0.75000   | 0.37(8)  | 3.478  |
| 4f   | O    | 0.33333 | 0.66667 | 0.0917(5) | 1.000    | 0.7921 |

Table S2. Resistance values calculated from the fitting of the Nyquist plots displayed in Fig. 8 to the equivalent circuit.

| <b>Electrode</b> | <b>State</b> | <b><math>R_{sl} /</math><br/><b>Ohm·g</b></b> | <b><math>R_{ct} /</math><br/><b>Ohm·g</b></b> |
|------------------|--------------|-----------------------------------------------|-----------------------------------------------|
| <b>NFM</b>       | OCV          | 5.07                                          | 6.50                                          |
|                  | Charge       | 2.31                                          | 10.32                                         |
|                  | Discharge    | 3.60                                          | 7.67                                          |
| <b>NFMb</b>      | OCV          | 4.59                                          | 0.97                                          |
|                  | Charge       | 8.79                                          | 1.52                                          |
|                  | Discharge    | 29.65                                         | 27.48                                         |
| <b>NFMc</b>      | OCV          | 0.48                                          | 2.98                                          |
|                  | Charge       | 1.66                                          | 0.24                                          |
|                  | Discharge    | 7.16                                          | 2.39                                          |
| <b>NFMm</b>      | OCV          | 8.46                                          | 2.35                                          |
|                  | Charge       | 10.60                                         | 14.16                                         |
|                  | Discharge    | 1.74                                          | 0.45                                          |
| <b>NFMp</b>      | OCV          | 11.04                                         | 0.86                                          |
|                  | Charge       | 1.54                                          | 2.55                                          |
|                  | Discharge    | 6.69                                          | 0.65                                          |

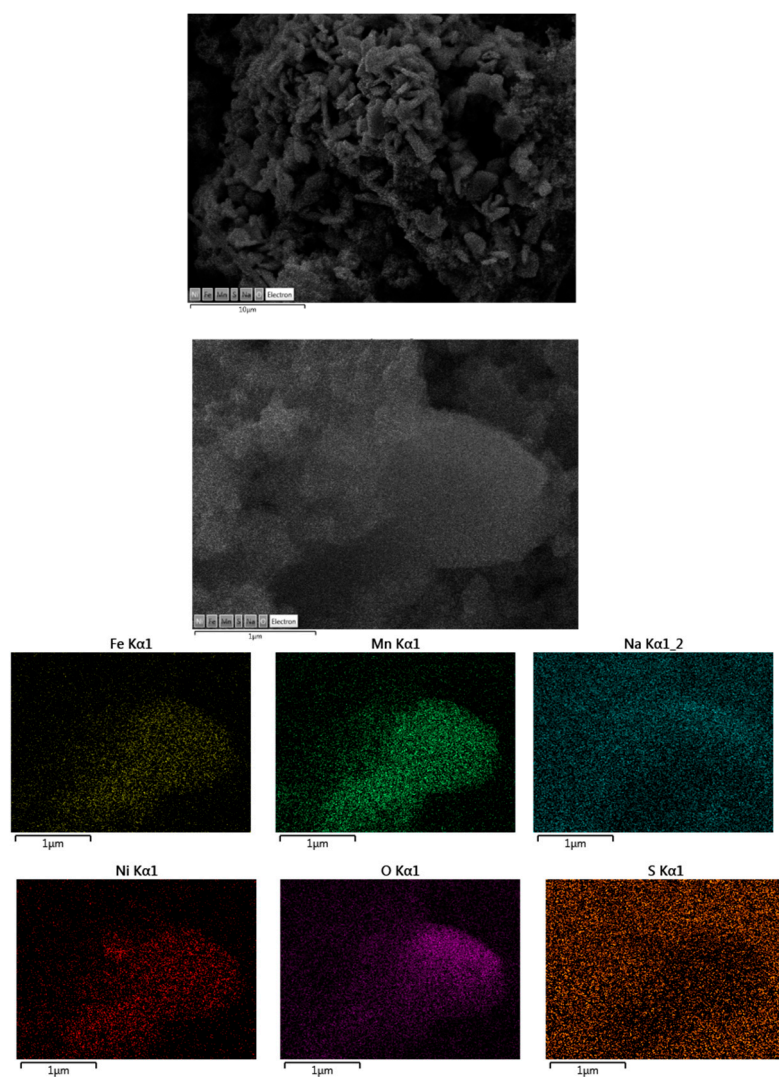

Figure S1. FSEM images and composition maps of an NFMp electrode after the first charge.

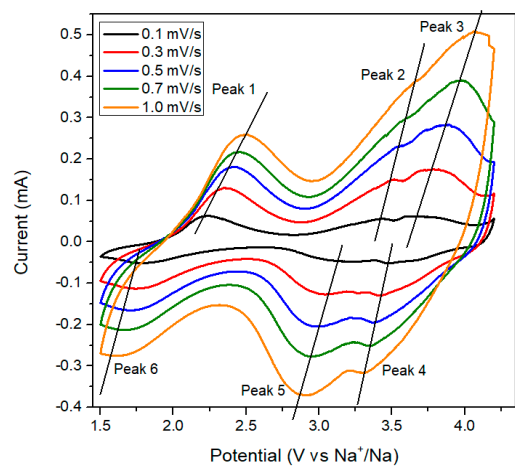

Figure S2. Example of cyclic voltammetry experiment at different scan rates (NFM electrode).
